# Supplementary material
Source: PubMed Central journal article supplement (PMC6964735)
Supplement: JB.00544-19-s0001.pdf [file JB.00544-19-s0001.pdf]

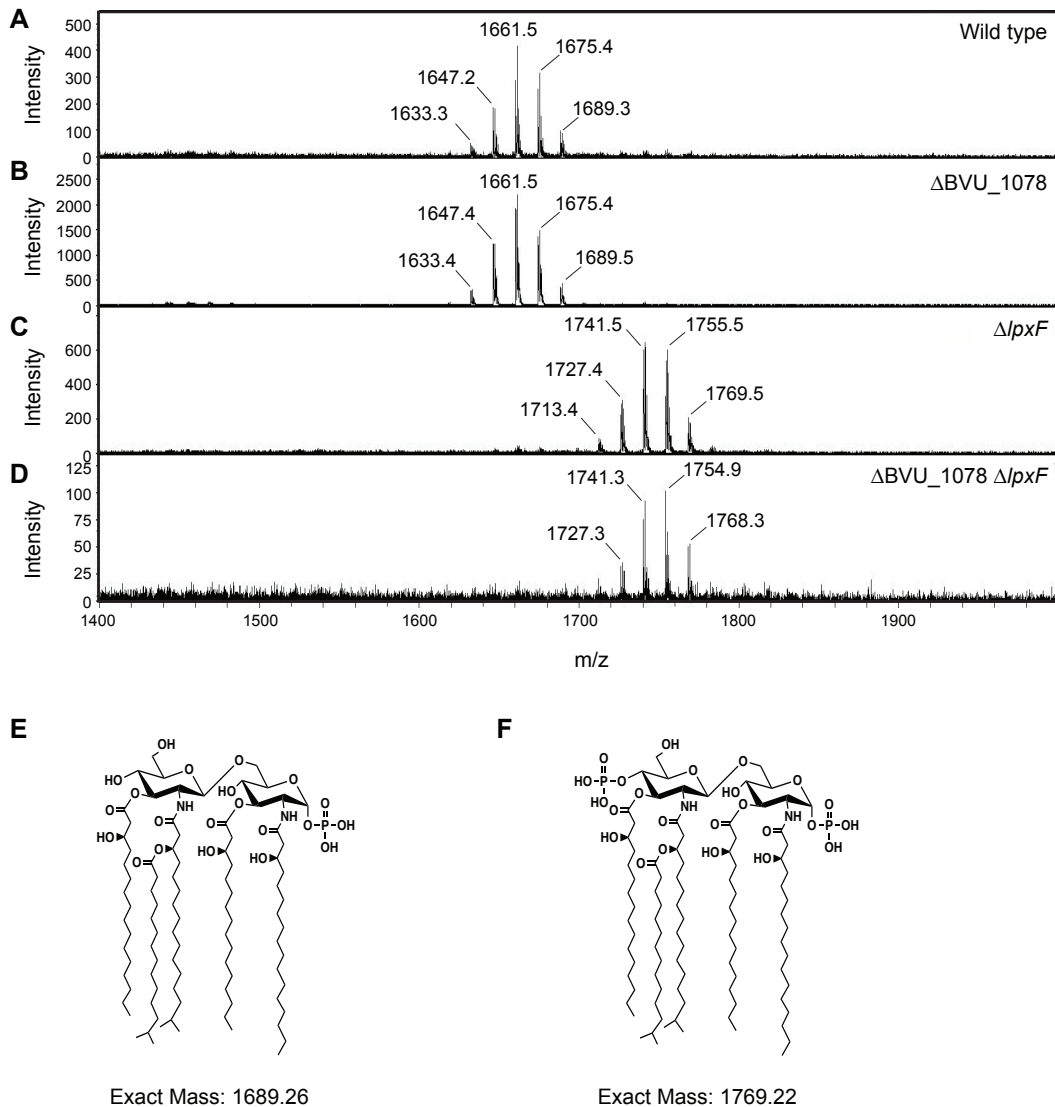

**Figure S1. Analysis of lipid A from *B. vulgatus* wildtype, *lpxF*, BVU\_1078, and double mutant strains by mass spectrometry. A-D.** MALDI-TOF mass spectra. Because *Bacteroides* exhibit variable fatty acyl chain lengths and branching patterns, each spectrum exhibits a cluster of peaks that differ by 14 mass units, reflecting the variable number of methylene ( $\text{CH}_2$ ) groups. Each panel represents a distinct genotype as indicated. **E, F.** Representative structures of wildtype and  $\Delta$ BVU\_1078 strains (**E**) and of  $\Delta$ *lpxF* and  $\Delta$ *lpxF*  $\Delta$ BVU\_1078 double mutant strains (**F**). In **E** and **F**, structures represent the species with the highest mass:charge ratio ( $m/z$ ).

Figure S1
